# Supplementary material for: Syntheses and characterization of two new layered ternary chalcogenides NaScQ2 (Q = Se and Te)
Source: Royal Society of Chemistry journal article supplement (doi:10.1039/d2nj04783g), 2022-01-01
Supplement: d2nj04783g1.pdf [file d2nj04783g1.pdf]

## Syntheses and Characterization of Two New Layered Ternary Chalcogenides NaScQ<sub>2</sub> (Q = Se and Te)

Gopabandhu Panigrahi,<sup>a</sup> Sweta Yadav,<sup>a</sup> Subhendu Jana,<sup>a</sup> Arghya Ghosh,<sup>b</sup> Manish K. Niranjana,<sup>b</sup> and Jai Prakash<sup>a,\*</sup>

<sup>a</sup>Department of Chemistry, Indian Institute of Technology Hyderabad, Kandi, Sangareddy, Telangana 502284, India

<sup>b</sup>Department of Physics, Indian Institute of Technology Hyderabad, Kandi, Sangareddy, Telangana 502284, India

### Electronic Supplementary Information (ESI)

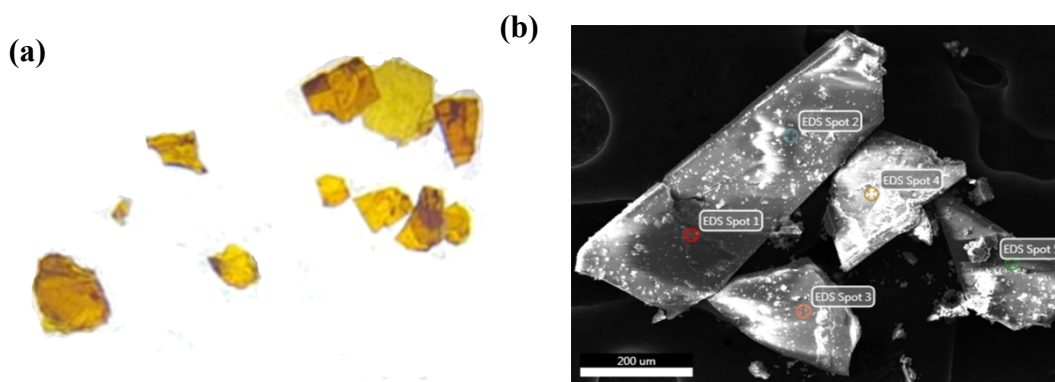

**Fig. S11** An (a) optical microscopic image and (b) SEM image of a few crystals of the NaScSe<sub>2</sub>.

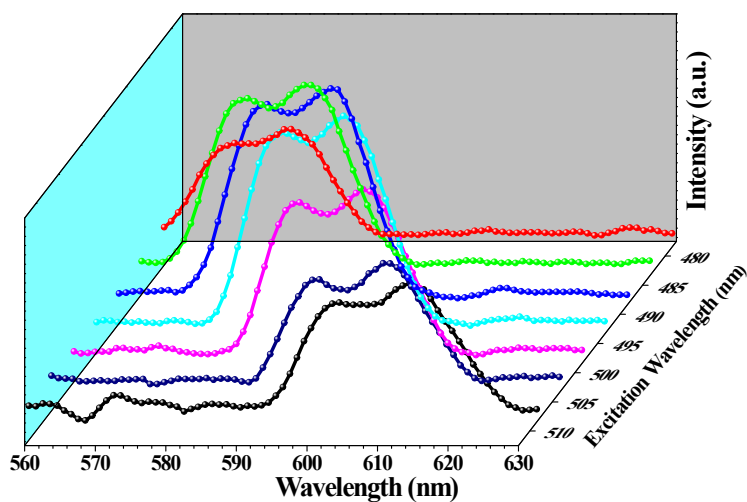

**Fig. S12** The fluorescence spectroscopic datasets of the polycrystalline NaScSe<sub>2</sub> at different excitation wavelengths.

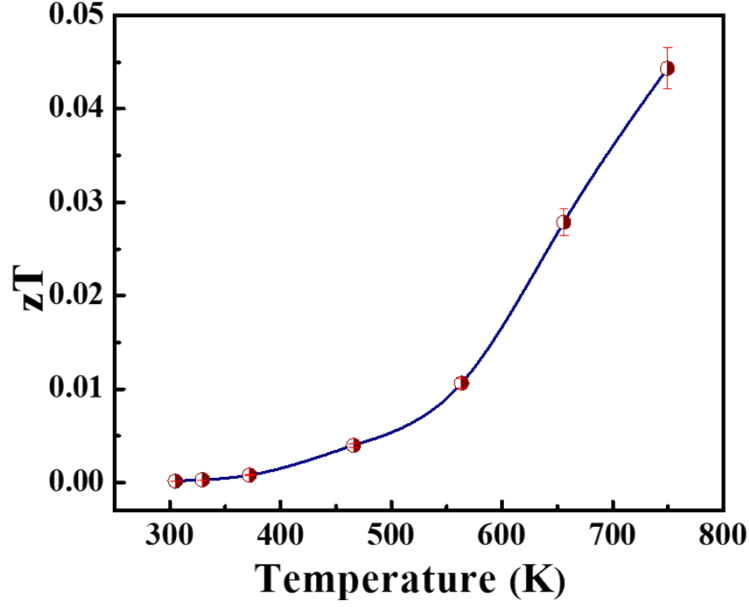

**Fig. S13** The thermoelectric figure of merit ( $zT$ ) of the polycrystalline NaScTe<sub>2</sub> sample.

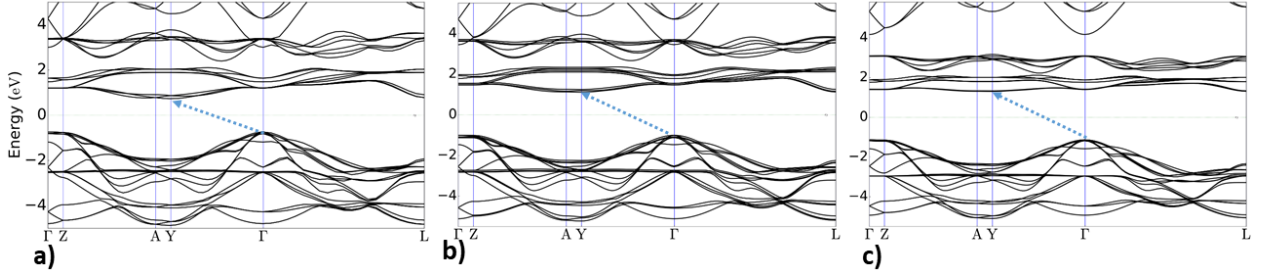

**Fig. S14** The band structure along high symmetry direction in the Brillouin zone for the NaScSe<sub>2</sub> structure computed using **a)** GGA **b)** SCAN and **c)** mBJ XC functionals. The high symmetry  $k$ -points are  $\Gamma \equiv (0, 0, 0)$ ,  $Z \equiv \left(0, 0, \frac{1}{2}\right)$ ,  $A \equiv \left(0, \frac{1}{2}, \frac{1}{2}\right)$ ,  $Y \equiv \left(0, \frac{1}{2}, 0\right)$ ,  $L \equiv \left(\frac{1}{2}, \frac{1}{2}, \frac{1}{2}\right)$ .

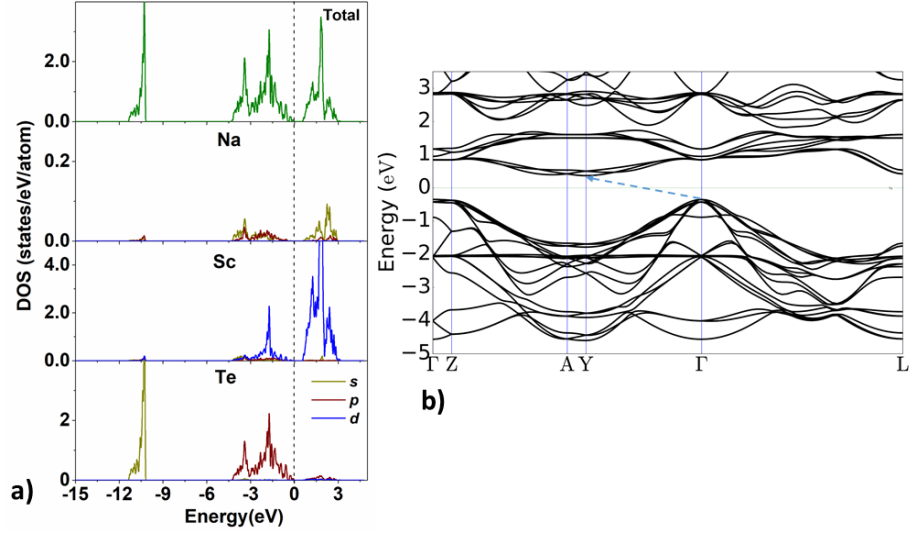

**Fig. S15 (a)** The total and projected density of states (DOS) and **(b)** the band structure along high symmetry direction in the Brillouin zone for the NaScTe<sub>2</sub> structure. The dotted line in (a) indicates the valence band maximum. The high symmetry  $k$ -points are  $\Gamma \equiv (0, 0, 0)$ ,  $Z \equiv (0, 0, \frac{1}{2})$ ,  $A \equiv (0, \frac{1}{2}, \frac{1}{2})$ ,  $Y \equiv (0, \frac{1}{2}, 0)$ ,  $L \equiv (\frac{1}{2}, \frac{1}{2}, \frac{1}{2})$ .

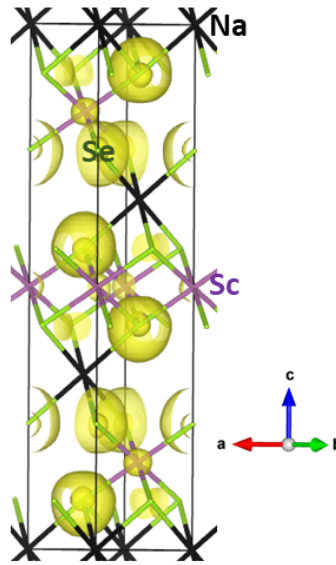

**Fig. SI6** The 3D iso-surfaces of the electron localization function (ELF) for the NaScSe<sub>2</sub> with  $ELF = 0.75$ . The yellow cloud indicates the density of transferred charge.

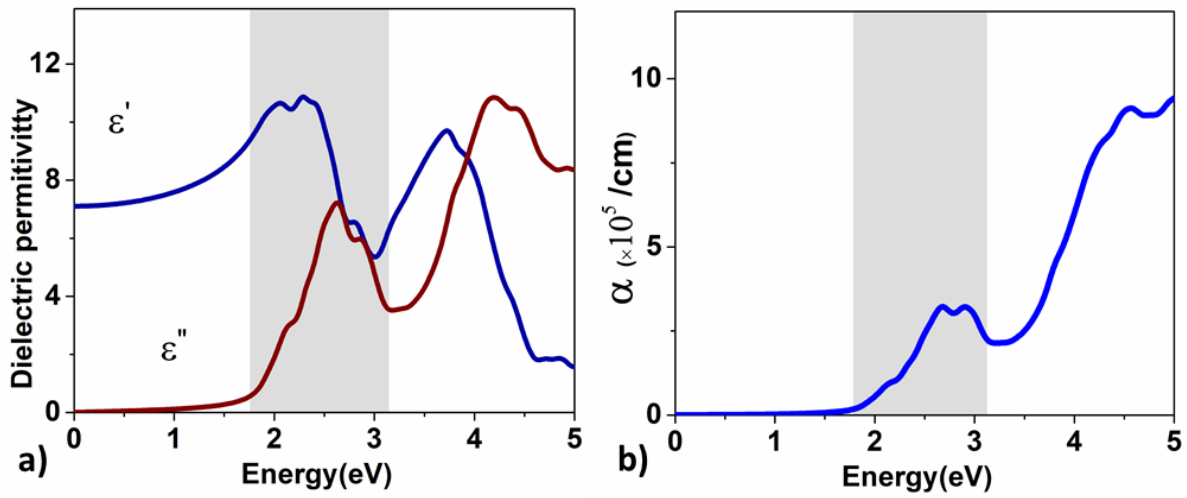

**Fig. SI7** (a) The real ( $\epsilon'$ ) and imaginary ( $\epsilon''$ ) parts of frequency-dependent dielectric function for the NaScSe<sub>2</sub>. (b) The absorption coefficient ( $\alpha$ ) values as a function of photon energy.

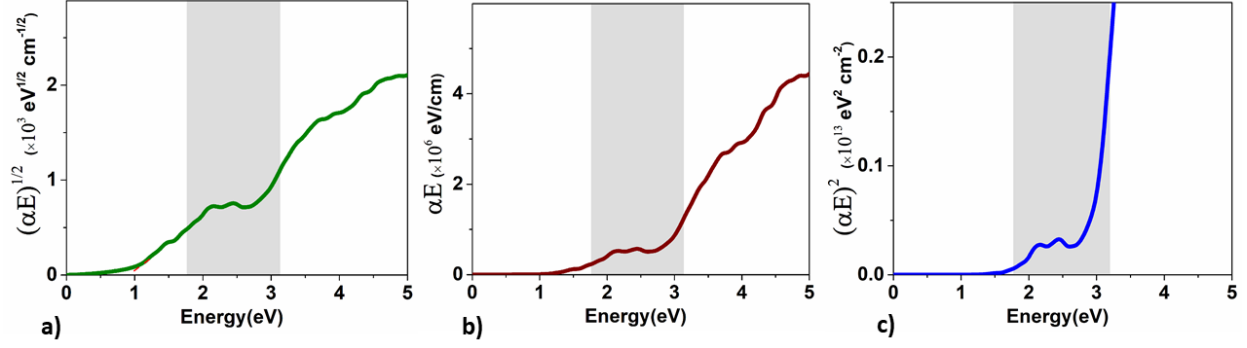

**Fig. S18** (a) The values of the  $(\alpha E)^{1/2}$ , (b)  $(\alpha E)$ , and (c)  $(\alpha E)^2$  as a function of energy for the NaScTe<sub>2</sub>. The symbols  $\alpha$  and  $E$  represent absorption and energy, respectively.

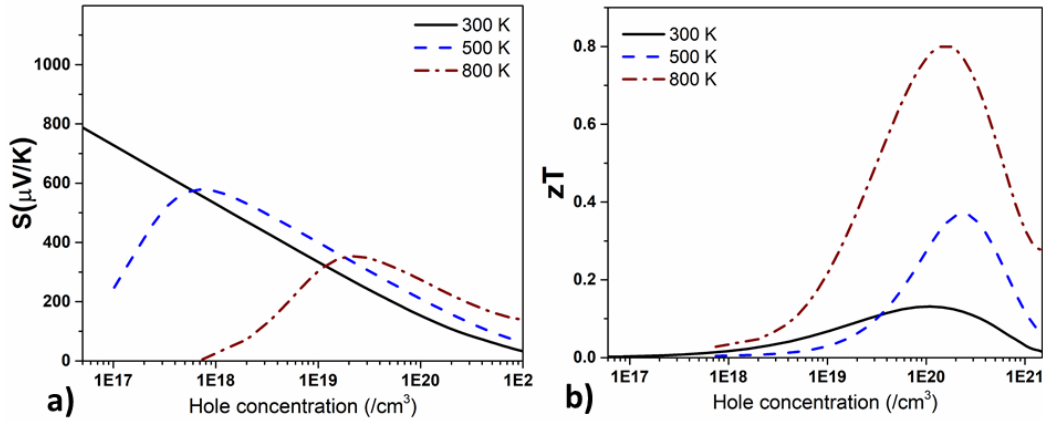

**Fig. S19** (a) The Seebeck coefficient ( $\mu V/K$ ) and (b) the  $zT$  values as a function of hole concentration for the NaScTe<sub>2</sub> structure.

## S1: Optical Properties

The optical parameters are computed from the complex dielectric function  $\varepsilon(\omega) = \varepsilon'(\omega) + i\varepsilon''(\omega)$  which is in turn is computed from the single-particle energy bands. The imaginary part of the dielectric function  $\varepsilon''(\omega)$  is obtained from the expression [7]:

$$\varepsilon''_{ij}(\omega) = \frac{4\pi^2 e^2}{V_c} \lim_{q \rightarrow 0} \sum_{c,v,\vec{k}} 2w_{\vec{k}} \delta(\varepsilon_{c\vec{k}} - \varepsilon_{v\vec{k}} - \omega) \times \langle u_{c\vec{k} + \hat{e}_i q} | u_{v\vec{k}} \rangle \langle u_{c\vec{k} + \hat{e}_j q} | u_{v\vec{k}} \rangle^* \quad (\text{S1-1})$$

where  $V_c$  is the volume of the unit cell; indices  $v$  and  $c$  indicate the valence band (VB) and the conduction band (CB) states, respectively;  $u_{c\vec{k}}$  is the cell periodic part of the orbitals at the wave vector  $\vec{k}$ ;  $\varepsilon_{c\vec{k}}$  and  $\varepsilon_{v\vec{k}}$  are CB and VB single-electron energy at  $\vec{k}$ ;  $w_{\vec{k}}$  is the weight of the k-points;

$\hat{e}_i$  and  $\hat{e}_j$  are the unit vectors for the three Cartesian directions. The real part of the dielectric function  $\varepsilon'(\omega)$  is obtained using the Kramers-Kronig transformation as:

$$\varepsilon'_{ij}(\omega) = 1 + \frac{2}{\pi} P \int_0^{\infty} \frac{\varepsilon''_{ij}(\omega') \omega'}{\omega'^2 - \omega^2 + i\eta} d\omega' \quad (\text{S1-2})$$

where  $\eta$  is a small complex shift and  $P$  is the principal value. The absorption coefficient  $\alpha(\omega)$  is given in terms of  $\varepsilon'(\omega)$  and  $\varepsilon''(\omega)$  as:

$$\alpha(\omega) = \frac{\sqrt{2}\omega}{c} [\sqrt{\varepsilon'(\omega)^2 + \varepsilon''(\omega)^2} - \varepsilon'(\omega)]^{1/2} \quad (\text{S1-3})$$

## S2: Thermoelectric properties

The first-principles thermoelectric parameters are obtained from the electronic band structure and semi-classical Boltzmann transport theory within the rigid band approach [8]. The carrier concentration ( $p$ - or  $n$ -type) in the system is introduced by shifting the chemical potential. The electrical conductivity ( $\sigma_{ij}$ ) as a function of temperature ( $T$ ) and chemical potential ( $\mu$ ) is calculated as:

$$\sigma_{ij}(T;\mu) = \frac{1}{V} \int \sigma_{ij}(\epsilon) \left[ -\frac{\partial f_{\mu}(T;\mu)}{\partial \epsilon} \right] d\epsilon \quad (\text{S2-1})$$

where  $V$  is the volume,  $\epsilon$  is the energy,  $f_{\mu}(T;\mu)$  is the Fermi function.  $\sigma_{ij}$  as function of energy ( $\epsilon$ ) can be expressed as:

$$\sigma_{ij}(\epsilon) = \frac{1}{N} \sum_{n,\vec{k}} \sigma_{ij}(n,\vec{k}) \delta(\epsilon - \epsilon_{n,\vec{k}}) \quad (\text{S2-2})$$

where  $\epsilon_{n,\vec{k}}$  are the band energies and  $N$  is the number of  $\vec{k}$  points in the Brillouin zone.  $\sigma_{ij}(n,\vec{k})$  is given in terms of relaxation time  $\tau_{n,\vec{k}}$  and group velocity  $\vec{v}(n,\vec{k})$  as:

$$\sigma_{ij}(n,\vec{k}) = e^2 \tau_{n,\vec{k}} v_i(n,\vec{k}) v_j(n,\vec{k}) \quad (\text{S2-3})$$

The Seebeck coefficient tensor ( $S_{ij}$ ) as a function of temperature ( $T$ ) and chemical potential ( $\mu$ ) is given as :

$$S_{ij}(T;\mu) = \frac{1}{eTV\sigma_{ij}(T;\mu)} \int \sigma_{ij}(\epsilon) (\epsilon - \mu) \left[ -\frac{\partial f_{\mu}(T;\mu)}{\partial \epsilon} \right] d\epsilon \quad (\text{S2-4})$$

The total thermal conductivity ( $k$ ) is given as  $k = k_e + k_l$  where  $k_e$  is the electronic component and  $k_l$  is the lattice (phonon) component of  $k$ . The electronic part of thermal conductivity ( $k_e$ ) is related to electrical conductivity ( $\sigma$ ) as  $k_e = L_0 \sigma T$  (Wiedemann-Franz relation), where  $L_0 = \frac{\pi^2}{3} \left( \frac{k_B}{e} \right)^2$  is the Lorentz number. The quantities  $\sigma$  and  $k_e$  are computed with respect to the relaxation time  $\tau = (T_0 \times n_0^{1/3}) / (T n^{1/3}) \times 10^{-14} \text{s}$  where  $n_0$  is the carrier concentration at

$$T_0 = 300 \text{ K}. \text{ The figure of merit } (zT) \text{ is calculates using } zT = \frac{S^2 \sigma T}{(k_e + k_l)}.$$

**Table S11** The atomic displacement parameters ( $\text{\AA}^2$ ) for the  $\text{NaScQ}_2$  ( $Q = \text{Se}$  and  $\text{Te}$ ) structures.

|                           |  | $U^{11}$    | $U^{22}$    | $U^{33}$   | $U^{12}$    | $U^{13}$ | $U^{23}$ |
|---------------------------|--|-------------|-------------|------------|-------------|----------|----------|
| <b>NaScSe<sub>2</sub></b> |  |             |             |            |             |          |          |
| Na01                      |  | 0.0247(9)   | 0.0247(9)   | 0.0234(16) | 0.0123(4)   | 0.000    | 0.000    |
| Sc01                      |  | 0.0115(3)   | 0.0115(3)   | 0.0174(6)  | 0.00577(17) | 0.000    | 0.000    |
| Se01                      |  | 0.01196(19) | 0.01196(19) | 0.0157(3)  | 0.00598(10) | 0.000    | 0.000    |
| <b>NaScTe<sub>2</sub></b> |  |             |             |            |             |          |          |
| Na01                      |  | 0.037(6)    | 0.037(6)    | 0.030(8)   | 0.019(3)    | 0.000    | 0.000    |
| Sc01                      |  | 0.0117(19)  | 0.0117(19)  | 0.039(4)   | 0.0058(10)  | 0.000    | 0.000    |
| Te01                      |  | 0.0146(6)   | 0.0146(6)   | 0.0343(10) | 0.0073(3)   | 0.000    | 0.000    |

**Table S12** The geometric parameters ( $\text{\AA}$ ) for the  $\text{NaScSe}_2$  structure.

|                           |            |                            |            |
|---------------------------|------------|----------------------------|------------|
| Na01—Se01 <sup>i</sup>    | 2.9814 (5) | Na01—Na01 <sup>x</sup>     | 3.9191 (6) |
| Na01—Se01 <sup>ii</sup>   | 2.9814 (5) | Na01—Na01 <sup>xi</sup>    | 3.9191 (6) |
| Na01—Se01 <sup>iii</sup>  | 2.9814 (5) | Na01—Na01 <sup>xii</sup>   | 3.9191 (6) |
| Na01—Se01 <sup>iv</sup>   | 2.9814 (5) | Sc01—Se01 <sup>xiii</sup>  | 2.7203 (4) |
| Na01—Se01 <sup>v</sup>    | 2.9814 (5) | Sc01—Se01 <sup>xiv</sup>   | 2.7203 (4) |
| Na01—Se01 <sup>vi</sup>   | 2.9814 (5) | Sc01—Se01 <sup>xv</sup>    | 2.7203 (4) |
| Na01—Na01 <sup>vii</sup>  | 3.9191 (6) | Sc01—Se01 <sup>xvi</sup>   | 2.7203 (4) |
| Na01—Na01 <sup>viii</sup> | 3.9191 (6) | Sc01—Se01 <sup>xvii</sup>  | 2.7203 (4) |
| Na01—Na01 <sup>ix</sup>   | 3.9191 (6) | Sc01—Se01 <sup>xviii</sup> | 2.7203 (4) |
|                           |            |                            |            |

|                                                |              |                                                  |              |
|------------------------------------------------|--------------|--------------------------------------------------|--------------|
| Se01 <sup>i</sup> —Na01—Se01 <sup>ii</sup>     | 180.000 (13) | Se01 <sup>iv</sup> —Na01—Na01 <sup>xi</sup>      | 90.0         |
| Se01 <sup>i</sup> —Na01—Se01 <sup>iii</sup>    | 82.182 (16)  | Se01 <sup>v</sup> —Na01—Na01 <sup>xi</sup>       | 48.909 (8)   |
| Se01 <sup>ii</sup> —Na01—Se01 <sup>iii</sup>   | 97.818 (16)  | Se01 <sup>vi</sup> —Na01—Na01 <sup>xi</sup>      | 131.091 (8)  |
| Se01 <sup>i</sup> —Na01—Se01 <sup>iv</sup>     | 97.818 (16)  | Na01 <sup>vii</sup> —Na01—Na01 <sup>xi</sup>     | 60.0         |
| Se01 <sup>ii</sup> —Na01—Se01 <sup>iv</sup>    | 82.182 (16)  | Na01 <sup>viii</sup> —Na01—Na01 <sup>xi</sup>    | 120.0        |
| Se01 <sup>iii</sup> —Na01—Se01 <sup>iv</sup>   | 180.000 (13) | Na01 <sup>ix</sup> —Na01—Na01 <sup>xi</sup>      | 120.0        |
| Se01 <sup>i</sup> —Na01—Se01 <sup>v</sup>      | 82.182 (16)  | Na01 <sup>x</sup> —Na01—Na01 <sup>xi</sup>       | 180.0        |
| Se01 <sup>ii</sup> —Na01—Se01 <sup>v</sup>     | 97.818 (16)  | Se01 <sup>i</sup> —Na01—Na01 <sup>xii</sup>      | 90.0         |
| Se01 <sup>iii</sup> —Na01—Se01 <sup>v</sup>    | 82.182 (16)  | Se01 <sup>ii</sup> —Na01—Na01 <sup>xii</sup>     | 90.0         |
| Se01 <sup>iv</sup> —Na01—Se01 <sup>v</sup>     | 97.818 (16)  | Se01 <sup>iii</sup> —Na01—Na01 <sup>xii</sup>    | 131.091 (8)  |
| Se01 <sup>i</sup> —Na01—Se01 <sup>vi</sup>     | 97.818 (16)  | Se01 <sup>iv</sup> —Na01—Na01 <sup>xii</sup>     | 48.909 (8)   |
| Se01 <sup>ii</sup> —Na01—Se01 <sup>vi</sup>    | 82.182 (16)  | Se01 <sup>v</sup> —Na01—Na01 <sup>xii</sup>      | 48.909 (8)   |
| Se01 <sup>iii</sup> —Na01—Se01 <sup>vi</sup>   | 97.818 (16)  | Se01 <sup>vi</sup> —Na01—Na01 <sup>xii</sup>     | 131.091 (8)  |
| Se01 <sup>iv</sup> —Na01—Se01 <sup>vi</sup>    | 82.182 (16)  | Na01 <sup>vii</sup> —Na01—Na01 <sup>xii</sup>    | 120.0        |
| Se01 <sup>v</sup> —Na01—Se01 <sup>vi</sup>     | 180.000 (13) | Na01 <sup>viii</sup> —Na01—Na01 <sup>xii</sup>   | 60.0         |
| Se01 <sup>i</sup> —Na01—Na01 <sup>vii</sup>    | 131.091 (8)  | Na01 <sup>ix</sup> —Na01—Na01 <sup>xii</sup>     | 180.0        |
| Se01 <sup>ii</sup> —Na01—Na01 <sup>vii</sup>   | 48.909 (8)   | Na01 <sup>x</sup> —Na01—Na01 <sup>xii</sup>      | 120.0        |
| Se01 <sup>iii</sup> —Na01—Na01 <sup>vii</sup>  | 48.909 (8)   | Na01 <sup>xi</sup> —Na01—Na01 <sup>xii</sup>     | 60.0         |
| Se01 <sup>iv</sup> —Na01—Na01 <sup>vii</sup>   | 131.091 (8)  | Se01 <sup>xiii</sup> —Sc01—Se01 <sup>xiv</sup>   | 180.0        |
| Se01 <sup>v</sup> —Na01—Na01 <sup>vii</sup>    | 90.0         | Se01 <sup>xiii</sup> —Sc01—Se01 <sup>xv</sup>    | 92.166 (15)  |
| Se01 <sup>vi</sup> —Na01—Na01 <sup>vii</sup>   | 90.0         | Se01 <sup>xiv</sup> —Sc01—Se01 <sup>xv</sup>     | 87.834 (15)  |
| Se01 <sup>i</sup> —Na01—Na01 <sup>viii</sup>   | 48.909 (8)   | Se01 <sup>xiii</sup> —Sc01—Se01 <sup>xvi</sup>   | 87.834 (15)  |
| Se01 <sup>ii</sup> —Na01—Na01 <sup>viii</sup>  | 131.091 (8)  | Se01 <sup>xiv</sup> —Sc01—Se01 <sup>xvi</sup>    | 92.166 (15)  |
| Se01 <sup>iii</sup> —Na01—Na01 <sup>viii</sup> | 131.091 (8)  | Se01 <sup>xv</sup> —Sc01—Se01 <sup>xvi</sup>     | 180.0        |
| Se01 <sup>iv</sup> —Na01—Na01 <sup>viii</sup>  | 48.909 (8)   | Se01 <sup>xiii</sup> —Sc01—Se01 <sup>xvii</sup>  | 87.835 (16)  |
| Se01 <sup>v</sup> —Na01—Na01 <sup>viii</sup>   | 90.0         | Se01 <sup>xiv</sup> —Sc01—Se01 <sup>xvii</sup>   | 92.165 (15)  |
| Se01 <sup>vi</sup> —Na01—Na01 <sup>viii</sup>  | 90.0         | Se01 <sup>xv</sup> —Sc01—Se01 <sup>xvii</sup>    | 87.835 (15)  |
| Na01 <sup>vii</sup> —Na01—Na01 <sup>viii</sup> | 180.0        | Se01 <sup>xvi</sup> —Sc01—Se01 <sup>xvii</sup>   | 92.165 (15)  |
| Se01 <sup>i</sup> —Na01—Na01 <sup>ix</sup>     | 90.0         | Se01 <sup>xiii</sup> —Sc01—Se01 <sup>xviii</sup> | 92.165 (15)  |
| Se01 <sup>ii</sup> —Na01—Na01 <sup>ix</sup>    | 90.0         | Se01 <sup>xiv</sup> —Sc01—Se01 <sup>xviii</sup>  | 87.835 (16)  |
| Se01 <sup>iii</sup> —Na01—Na01 <sup>ix</sup>   | 48.909 (8)   | Se01 <sup>xv</sup> —Sc01—Se01 <sup>xviii</sup>   | 92.165 (15)  |
| Se01 <sup>iv</sup> —Na01—Na01 <sup>ix</sup>    | 131.091 (8)  | Se01 <sup>xvi</sup> —Sc01—Se01 <sup>xviii</sup>  | 87.835 (15)  |
| Se01 <sup>v</sup> —Na01—Na01 <sup>ix</sup>     | 131.091 (8)  | Se01 <sup>xvii</sup> —Sc01—Se01 <sup>xviii</sup> | 180.000 (16) |



|                                               |             |                                                |              |
|-----------------------------------------------|-------------|------------------------------------------------|--------------|
| Se01 <sup>vi</sup> —Na01—Na01 <sup>ix</sup>   | 48.909 (8)  | Sc01 <sup>ii</sup> —Se01—Sc01 <sup>iv</sup>    | 92.166 (16)  |
| Na01 <sup>vii</sup> —Na01—Na01 <sup>ix</sup>  | 60.0        | Sc01 <sup>ii</sup> —Se01—Sc01 <sup>vi</sup>    | 92.166 (16)  |
| Na01 <sup>viii</sup> —Na01—Na01 <sup>ix</sup> | 120.0       | Sc01 <sup>iv</sup> —Se01—Sc01 <sup>vi</sup>    | 92.166 (15)  |
| Se01 <sup>i</sup> —Na01—Na01 <sup>x</sup>     | 48.909 (8)  | Sc01 <sup>ii</sup> —Se01—Na01 <sup>xiv</sup>   | 173.088 (15) |
| Se01 <sup>ii</sup> —Na01—Na01 <sup>x</sup>    | 131.091 (8) | Sc01 <sup>iv</sup> —Se01—Na01 <sup>xiv</sup>   | 92.627 (11)  |
| Se01 <sup>iii</sup> —Na01—Na01 <sup>x</sup>   | 90.0        | Sc01 <sup>vi</sup> —Se01—Na01 <sup>xiv</sup>   | 92.627 (11)  |
| Se01 <sup>iv</sup> —Na01—Na01 <sup>x</sup>    | 90.0        | Sc01 <sup>ii</sup> —Se01—Na01 <sup>xvi</sup>   | 92.627 (11)  |
| Se01 <sup>v</sup> —Na01—Na01 <sup>x</sup>     | 131.091 (8) | Sc01 <sup>iv</sup> —Se01—Na01 <sup>xvi</sup>   | 173.088 (15) |
| Se01 <sup>vi</sup> —Na01—Na01 <sup>x</sup>    | 48.909 (8)  | Sc01 <sup>vi</sup> —Se01—Na01 <sup>xvi</sup>   | 92.627 (11)  |
| Na01 <sup>vii</sup> —Na01—Na01 <sup>x</sup>   | 120.0       | Na01 <sup>xiv</sup> —Se01—Na01 <sup>xvi</sup>  | 82.182 (16)  |
| Na01 <sup>viii</sup> —Na01—Na01 <sup>x</sup>  | 60.0        | Sc01 <sup>ii</sup> —Se01—Na01 <sup>xvii</sup>  | 92.627 (11)  |
| Na01 <sup>ix</sup> —Na01—Na01 <sup>x</sup>    | 60.0        | Sc01 <sup>iv</sup> —Se01—Na01 <sup>xvii</sup>  | 92.627 (11)  |
| Se01 <sup>i</sup> —Na01—Na01 <sup>xi</sup>    | 131.091 (8) | Sc01 <sup>vi</sup> —Se01—Na01 <sup>xvii</sup>  | 173.088 (15) |
| Se01 <sup>ii</sup> —Na01—Na01 <sup>xi</sup>   | 48.909 (8)  | Na01 <sup>xiv</sup> —Se01—Na01 <sup>xvii</sup> | 82.182 (16)  |
| Se01 <sup>iii</sup> —Na01—Na01 <sup>xi</sup>  | 90.0        | Na01 <sup>xvi</sup> —Se01—Na01 <sup>xvii</sup> | 82.182 (16)  |

Symmetry codes: (i)  $-x+2/3, -y+1/3, -z+1/3$ ; (ii)  $x-2/3, y-1/3, z-1/3$ ; (iii)  $-x-1/3, -y-2/3, -z+1/3$ ; (iv)  $x+1/3, y+2/3, z-1/3$ ; (v)  $-x-1/3, -y+1/3, -z+1/3$ ; (vi)  $x+1/3, y-1/3, z-1/3$ ; (vii)  $x-1, y-1, z$ ; (viii)  $x+1, y+1, z$ ; (ix)  $x, y-1, z$ ; (x)  $x+1, y, z$ ; (xi)  $x-1, y, z$ ; (xii)  $x, y+1, z$ ; (xiii)  $-x-2/3, -y-1/3, -z+2/3$ ; (xiv)  $x+2/3, y+1/3, z+1/3$ ; (xv)  $-x+1/3, -y+2/3, -z+2/3$ ; (xvi)  $x-1/3, y-2/3, z+1/3$ ; (xvii)  $x-1/3, y+1/3, z+1/3$ ; (xviii)  $-x+1/3, -y-1/3, -z+2/3$ .

**Table S13** The geometric parameters (Å) for the NaScTe<sub>2</sub> structure.

|                                              |             |                                               |             |
|----------------------------------------------|-------------|-----------------------------------------------|-------------|
| Na01—Te01 <sup>i</sup>                       | 3.2180 (11) | Sc01—Te01 <sup>vii</sup>                      | 2.9460 (10) |
| Na01—Te01 <sup>ii</sup>                      | 3.2180 (11) | Sc01—Te01 <sup>viii</sup>                     | 2.9460 (10) |
| Na01—Te01 <sup>iii</sup>                     | 3.2180 (11) | Sc01—Te01 <sup>ix</sup>                       | 2.9460 (10) |
| Na01—Te01 <sup>iv</sup>                      | 3.2180 (11) | Sc01—Te01 <sup>x</sup>                        | 2.9460 (10) |
| Na01—Te01 <sup>v</sup>                       | 3.2180 (11) | Sc01—Te01 <sup>xi</sup>                       | 2.9461 (10) |
| Na01—Te01 <sup>vi</sup>                      | 3.2180 (11) | Sc01—Te01 <sup>xii</sup>                      | 2.9461 (10) |
|                                              |             |                                               |             |
| Te01 <sup>i</sup> —Na01—Te01 <sup>ii</sup>   | 180.00 (5)  | Te01 <sup>ix</sup> —Sc01—Te01 <sup>xi</sup>   | 88.47 (4)   |
| Te01 <sup>i</sup> —Na01—Te01 <sup>iii</sup>  | 81.98 (3)   | Te01 <sup>x</sup> —Sc01—Te01 <sup>xi</sup>    | 91.53 (4)   |
| Te01 <sup>ii</sup> —Na01—Te01 <sup>iii</sup> | 98.02 (3)   | Te01 <sup>vii</sup> —Sc01—Te01 <sup>xii</sup> | 91.53 (4)   |

|                                                |            |                                                |            |
|------------------------------------------------|------------|------------------------------------------------|------------|
| Te01 <sup>i</sup> —Na01—Te01 <sup>iv</sup>     | 98.02 (3)  | Te01 <sup>viii</sup> —Sc01—Te01 <sup>xii</sup> | 88.47 (4)  |
| Te01 <sup>ii</sup> —Na01—Te01 <sup>iv</sup>    | 81.98 (3)  | Te01 <sup>ix</sup> —Sc01—Te01 <sup>xii</sup>   | 91.53 (4)  |
| Te01 <sup>iii</sup> —Na01—Te01 <sup>iv</sup>   | 180.00 (5) | Te01 <sup>x</sup> —Sc01—Te01 <sup>xii</sup>    | 88.47 (4)  |
| Te01 <sup>i</sup> —Na01—Te01 <sup>v</sup>      | 98.02 (3)  | Te01 <sup>xi</sup> —Sc01—Te01 <sup>xii</sup>   | 180.00 (5) |
| Te01 <sup>ii</sup> —Na01—Te01 <sup>v</sup>     | 81.98 (3)  | Sc01 <sup>ii</sup> —Te01—Sc01 <sup>iv</sup>    | 91.53 (4)  |
| Te01 <sup>iii</sup> —Na01—Te01 <sup>v</sup>    | 98.02 (3)  | Sc01 <sup>ii</sup> —Te01—Sc01 <sup>v</sup>     | 91.53 (4)  |
| Te01 <sup>iv</sup> —Na01—Te01 <sup>v</sup>     | 81.98 (3)  | Sc01 <sup>iv</sup> —Te01—Sc01 <sup>v</sup>     | 91.53 (4)  |
| Te01 <sup>i</sup> —Na01—Te01 <sup>vi</sup>     | 81.98 (3)  | Sc01 <sup>ii</sup> —Te01—Na01 <sup>viii</sup>  | 173.41 (5) |
| Te01 <sup>ii</sup> —Na01—Te01 <sup>vi</sup>    | 98.02 (3)  | Sc01 <sup>iv</sup> —Te01—Na01 <sup>viii</sup>  | 93.061 (7) |
| Te01 <sup>iii</sup> —Na01—Te01 <sup>vi</sup>   | 81.98 (3)  | Sc01 <sup>v</sup> —Te01—Na01 <sup>viii</sup>   | 93.062 (8) |
| Te01 <sup>iv</sup> —Na01—Te01 <sup>vi</sup>    | 98.02 (3)  | Sc01 <sup>ii</sup> —Te01—Na01 <sup>x</sup>     | 93.061 (8) |
| Te01 <sup>v</sup> —Na01—Te01 <sup>vi</sup>     | 180.00 (5) | Sc01 <sup>iv</sup> —Te01—Na01 <sup>x</sup>     | 173.41 (5) |
| Te01 <sup>vii</sup> —Sc01—Te01 <sup>viii</sup> | 180.0      | Sc01 <sup>v</sup> —Te01—Na01 <sup>x</sup>      | 93.062 (8) |
| Te01 <sup>vii</sup> —Sc01—Te01 <sup>ix</sup>   | 91.53 (4)  | Na01 <sup>viii</sup> —Te01—Na01 <sup>x</sup>   | 81.98 (3)  |
| Te01 <sup>viii</sup> —Sc01—Te01 <sup>ix</sup>  | 88.47 (4)  | Sc01 <sup>ii</sup> —Te01—Na01 <sup>xi</sup>    | 93.062 (8) |
| Te01 <sup>vii</sup> —Sc01—Te01 <sup>x</sup>    | 88.47 (4)  | Sc01 <sup>iv</sup> —Te01—Na01 <sup>xi</sup>    | 93.062 (8) |
| Te01 <sup>viii</sup> —Sc01—Te01 <sup>x</sup>   | 91.53 (4)  | Sc01 <sup>v</sup> —Te01—Na01 <sup>xi</sup>     | 173.41 (5) |
| Te01 <sup>ix</sup> —Sc01—Te01 <sup>x</sup>     | 180.0      | Na01 <sup>viii</sup> —Te01—Na01 <sup>xi</sup>  | 81.98 (3)  |
| Te01 <sup>vii</sup> —Sc01—Te01 <sup>xi</sup>   | 88.47 (4)  | Na01 <sup>x</sup> —Te01—Na01 <sup>xi</sup>     | 81.98 (3)  |
| Te01 <sup>viii</sup> —Sc01—Te01 <sup>xi</sup>  | 91.53 (4)  |                                                |            |

Symmetry codes: (i)  $-x+2/3, -y+1/3, -z+1/3$ ; (ii)  $x-2/3, y-1/3, z-1/3$ ; (iii)  $-x-1/3, -y-2/3, -z+1/3$ ; (iv)  $x+1/3, y+2/3, z-1/3$ ; (v)  $x+1/3, y-1/3, z-1/3$ ; (vi)  $-x-1/3, -y+1/3, -z+1/3$ ; (vii)  $-x-2/3, -y-1/3, -z+2/3$ ; (viii)  $x+2/3, y+1/3, z+1/3$ ; (ix)  $-x+1/3, -y+2/3, -z+2/3$ ; (x)  $x-1/3, y-2/3, z+1/3$ ; (xi)  $x-1/3, y+1/3, z+1/3$ ; (xii)  $-x+1/3, -y-1/3, -z+2/3$ .
